# Supplementary material for: Lymphatic System and Fistulas—Radiological Imaging Primer
Source: MDPI journal article supplement (doi:10.3390/jvd2010003), 2023-01-11

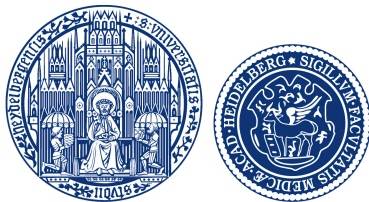

JVD

Electronic Supplement 1

Editorial  
Lymphatic System and Fistulas –  
Radiological Imaging Primer

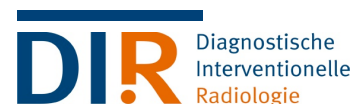

10. November 2022 / CMS

## Summary Report #1

### **“1st Surgical-Radiological RoundTable for the Improvement of the Interdisciplinary Treatment of Patients with Postoperative Lymphatic Fistulas”**

***March 19, 2022, Frankfurt am Main, Germany***

#### **1 Background**

Postoperative lymph fistulas can occur anywhere in the human body. Frequently, but not exclusively, lymphatic drainage disorders are the consequence of oncological surgical interventions: for example, after esophagectomy, duodenopancreatectomy, hysterectomy, or lymph node dissection.

Clinically, lymphatic drainage disorders present as chylothorax, chylous ascites, or percutaneous lymphatic fistulas, among others. They can also lead to wound healing disorders and subsequent infections.

Prof. Dr. med. Christof M Sommer,  
DeGIR, EBIR, fCIRSE  
Clinic of Radiology  
Clinic of Diagnostic and Interventional  
Radiology  
Im Neuenheimer Feld 420  
69120 Heidelberg Germany  
cmsommer@gmx.com

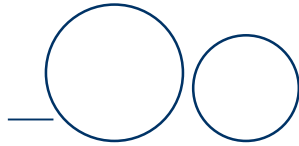

Lymphography allows not only the diagnosis but also the treatment of lymphatic drainage disorders. There are several approaches to this minimally invasive technique (Pieper et al. 2019). Lymphangiography is used to find location of lymphatic drainage in order to plan further treatment, but can also have a curative effect depending on the drainage volume (Sommer et al. 2020). In addition, there is the possibility of second-line interventional radiological therapy to close the lymphatic drainage pathways with cyanoacrylates or sclerosing agents (Pieper et al. 2019; Sommer et al. 2021).

## **2 Goal**

This roundtable of surgeons and interventional radiologists will identify the medical need for lymphography in the diagnosis and treatment of postoperative lymphatic drainage disorders and explore how to make this service available to all patients.

## **3 Time and Place**

March 19, 2022, Frankfurt am Main, Airport, 1:00-4:00 pm.

## **4 References**

Pieper CC, Hur S, Sommer CM, Nadolski G, Maleux G, Kim J, Itkin M. **Back to the Future: Lipiodol in Lymphography-From Diagnostics to Theranostics.** Invest Radiol. 2019 Sep;54(9):600-615. doi: 10.1097/RLI.0000000000000578. PMID: 31283538.

Sommer CM, Pieper CC, Itkin M, Nadolski GJ, Hur S, Kim J, Maleux G, Kauczor HU, Richter GM. **Conventional Lymphangiography (CL) in the Management of Postoperative Lymphatic Leakage (PLL): A Systematic Review.** Rofo. 2020 Nov;192(11):1025-1035. English. doi: 10.1055/a-1131-7889. Epub 2020 Mar 26. PMID: 32215900.

Sommer CM, Pieper CC, Offensperger F, Pan F, Killguss HJ, Königer J, Loos M, Hackert T, Wortmann M, Do TD, Maleux G,

Prof. Dr. med. Christof M Sommer,  
DeGIR, EBIR, fCIRSE  
Clinic of Radiology  
Clinic of Diagnostic and Interventional  
Radiology  
Im Neuenheimer Feld 420  
69120 Heidelberg Germany  
cmsommer@gmx.com

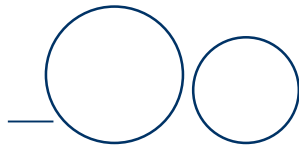

Richter GM, Kauczor HU, Kim J, Hur S. **Radiological management of postoperative lymphorrhea.** Langenbecks Arch Surg. 2021 Jun;406(4):945-969. doi: 10.1007/s00423-021-02094-z. Epub 2021 Apr 12. PMID: 33844077.

## **5 Participants**

Dr. Rosa Klotz, **Department of General, Visceral and Transplantation Surgery, Heidelberg University Hospital.**

Dr. Ulrike Heger, **Department of General, Visceral and Transplantation Surgery, Heidelberg University Hospital.**

Prof. Dr. Christof M Sommer, **Clinic of Diagnostic and Interventional Radiology, Heidelberg University Hospital.**

Privatdozent Dr. Claus Christian Pieper, **Clinic of Diagnostic and Interventional Radiology, Bonn University Hospital.**

Dr. Michael Heise, **Department of Surgery, Frankfurt University Hospital.**

Prof. Dr. Tatjana Gruber-Rouh, **Institute of Diagnostic and Interventional Radiology, Frankfurt University Hospital.**

Dr. Johannes Fritzmann, **Clinic and Polyclinic for Visceral, Thoracic and Vascular Surgery, Dresden University Hospital.**

Prof. Dr. med. Ralf-Thorsten Hoffmann, **Institute and Polyclinic for Diagnostic and Interventional Radiology, Dresden University Hospital.**

Dr. Hansjörg Killguss, **Department of General, Visceral, Thoracic and Transplantation Surgery, Stuttgart Clinics.**

Prof. Dr. Goetz M Richter, **Clinic of Diagnostic and Interventional Radiology, Stuttgart Clinics.**

Dr. Christian Reul, **Guerbet.**

Holger Bünger, **Guerbet.**

Barbara Kager, **Guerbet.**

Prof. Dr. med. Christof M Sommer,  
DeGIR, EBIR, fCIRSE  
Clinic of Radiology  
Clinic of Diagnostic and Interventional  
Radiology  
Im Neuenheimer Feld 420  
69120 Heidelberg Germany  
cmsommer@gmx.com



Michael Callahan, **Guerbet**.

## **6 Outcome Measures**

1. Caseload analysis in Germany.
2. Action plan 2022/2023
  - a. Training / Proctorship
  - b. Scientific communication / congress contributions (e.g. symposium DCK)
  - c. New clinical studies
  - d. Guidelines.
3. Expert opinion paper, white paper, etc..

## **7 Lectures**

Lymphatic leaks from the perspective of general/visceral surgery - triggers/incidents, frequencies (literature), reporting, surgical treatment options. **Department of General, Visceral and Transplantation Surgery, Heidelberg University Hospital & Department of Surgery, Frankfurt University Hospital** - 10 min.

Lymphatic leakage from the perspective of vascular surgery (TBD) - triggers/interventions, frequencies (literature), reporting, surgical treatment options. **NN & Clinic and Polyclinic for Visceral, Thoracic and Vascular Surgery, Dresden University Hospital** - 10 min.

Lymphatic leaks from a thoracic or transplant surgery (TBD) perspective - triggers/interventions, frequencies (literature), reporting, surgical treatment options. **Department of General, Visceral, Thoracic and Transplantation Surgery, Stuttgart Clinics** - 10 min.

Lymphangiography: approaches, diagnostics and therapeutic effect, literature review and case studies. **Clinic of Diagnostic and Interventional Radiology, Heidelberg University Hospital**



**& Institute of Diagnostic and Interventional Radiology,  
Frankfurt University Hospital - 10 min.**

Lymphatic interventions: TD embolization, MR lymphography, syndromes (e.g., plastic bronchitis), retrograde approaches, and case reports. ***Clinic of Diagnostic and Interventional Radiology, Bonn University Hospital - 10 min.***

Lymphography registry: approach and current developments. ***Clinic of Diagnostic and Interventional Radiology, Stuttgart Clinics & Institute and Polyclinic for Diagnostic and Interventional Radiology, Dresden University Hospital - 10 min.***

### **8 Questionnaire Result Presentation**

Presentation of the results of the preliminary questionnaire  
(Guerbet)

1. Confirmation / comments on the presented data?
2. After the review lectures: Which patient collective could / would be referred for lymphography?
3. What are (also after the lectures) barriers to refer patients to radiology for lymphography?
4. How can these barriers be overcome?

### **9 Discussion**

1. Optimizing the care of patients in clinical reality.
2. Surgical perspectives
  - a. Which of the "wishes" of surgery can be fulfilled immediately?

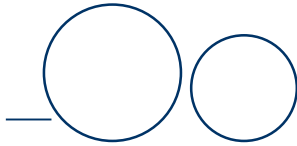

- b. Which of the wishes cannot be fulfilled immediately?  
Why?
  - c. How can these wishes be fulfilled in the future  
(training / studies, etc.)?
- 3. Lack of evidence - what kind of studies should be done?
- 4. Consensus document / white paper?!

## **10 Questionnaire**

See annex 1 and annex 2.

## **11 Get Together**

Further exchange of views and ideas in a somewhat more informal atmosphere.

**Annex 1 – Questionnaire Structure****A – Surgical Partner Perspective**

**1. *What are the 5 most common surgical procedures that result in lymphatic leakage (based on your own experience)?***

| Type | Frequency | Standard of care |
|------|-----------|------------------|
|      |           |                  |
|      |           |                  |
|      |           |                  |
|      |           |                  |
|      |           |                  |

**2. *In which other settings were lymphatic leakage observed?***

| Type | Frequency (if known) | Standard of care |
|------|----------------------|------------------|
|      |                      |                  |
|      |                      |                  |
|      |                      |                  |
|      |                      |                  |
|      |                      |                  |
|      |                      |                  |

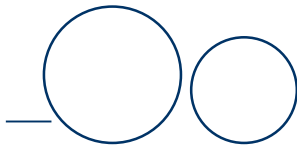

|  |  |  |
|--|--|--|
|  |  |  |
|--|--|--|

**3. What are the main reasons why a patient is not treated by lymphography or lymphatic interventions (check one)?**

| Reason                                                         | Fully agree | Partially agree | Do not agree at all |
|----------------------------------------------------------------|-------------|-----------------|---------------------|
| Reimbursement problems                                         |             |                 |                     |
| Availability of radiology room capacity                        |             |                 |                     |
| Lack of radiologists who can technically perform the procedure |             |                 |                     |
| Lack of information about the options and chances of success   |             |                 |                     |
| Lack of information about the radiological procedure           |             |                 |                     |
| No established or institutionalized treatment regimen          |             |                 |                     |
| Other                                                          |             |                 |                     |



**B – Radiological Partner Perspective**

- 1. What are the 5 most common surgical procedures that result in lymphatic leakage (based on your own experience)?**

| Type | Frequency | Standard of care |
|------|-----------|------------------|
|      |           |                  |
|      |           |                  |
|      |           |                  |
|      |           |                  |
|      |           |                  |

- 2. In which other settings were lymphatic leakage observed?**

| Type | Frequency (if known) | Standard of care |
|------|----------------------|------------------|
|      |                      |                  |
|      |                      |                  |
|      |                      |                  |
|      |                      |                  |
|      |                      |                  |
|      |                      |                  |
|      |                      |                  |

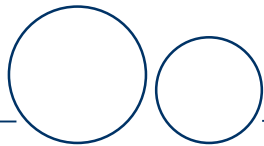

**3. What are the main reasons why a patient is not treated by lymphography or lymphatic interventions (check one)?**

| Reason                                                         | Fully agree | Partially agree | Do not agree at all |
|----------------------------------------------------------------|-------------|-----------------|---------------------|
| Reimbursement problems                                         |             |                 |                     |
| Availability of radiology room capacity                        |             |                 |                     |
| Lack of radiologists who can technically perform the procedure |             |                 |                     |
| Lack of information about the options and chances of success   |             |                 |                     |
| Lack of information about the radiological procedure           |             |                 |                     |
| No established or institutionalized treatment regimen          |             |                 |                     |
| Other                                                          |             |                 |                     |

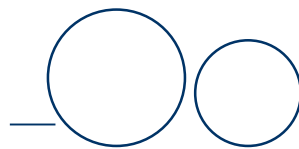

## Annex 2 – Questionnaire Preliminary Results

### A – Surgical Partner Perspective

**1. What are the 5 most common surgical procedures that result in lymphatic leakage (based on your own experience)?**

**2. In which other settings were lymphatic leakage observed?**

| Type                              | Frequency  | Standard of care                                                                | Center     |
|-----------------------------------|------------|---------------------------------------------------------------------------------|------------|
| Pancreas                          | Ca. 10%    | Step up approach (fat free diet, total parenteral nutrition, lymphangiography)  | Heidelberg |
| Pancreas                          | 10%        | Conservative                                                                    | Frankfurt  |
| Pancreas head resection           | Ca. 10%    | Fat free diet, total parenteral nutrition, conservative                         | Dresden    |
| Kidney transplantation            | 10%        | Surgical approach                                                               | Frankfurt  |
| Kidney transplantation            | 40%        |                                                                                 | Stuttgart  |
| Kidney transplantation            | 25%        | Conservative, drainage, sclerotherapy, surgical approach (fenestration)         | Heidelberg |
| Esophagectomy                     | 5%         | Step up approach (fat free diet, total parenteral nutrition, lymphangiography)  | Heidelberg |
| Esophagectomy                     | 40%        |                                                                                 | Stuttgart  |
| Thoracic surgery                  | 10%        | Surgical approach (clipping)                                                    | Dresden    |
| Lymph node dissection             | 5 per anno | Conservative, radiation therapy, surgical approach                              | Frankfurt  |
| Lymph node dissection inguinal    | 10%        | Lymphangiography, surgical approach                                             | Heidelberg |
| Lymphadenectomy inguinal          | Ca. 30%    | Sclerotherapy, lymphangiography, surgical approach                              | Dresden    |
| Lymphadenectomy axillary          | 10%        | Lymphangiography, surgical approach                                             | Heidelberg |
| Lymphadenectomy axillary          | 20%        | Sclerotherapy, lymphangiography, surgical approach                              | Dresden    |
| <b>Further</b>                    |            |                                                                                 |            |
| Bowel resection                   | 2 per anno | conservative                                                                    | Frankfurt  |
| Colorectal surgery                |            |                                                                                 | Heidelberg |
| Rectum resection                  | 60%        |                                                                                 | Stuttgart  |
| Vascular surgery                  | ?          |                                                                                 | Dresden    |
| Vascular surgery                  |            |                                                                                 | Heidelberg |
| Oncological liver surgery         | 5 per anno | conservative                                                                    | Frankfurt  |
| Liver resection                   | 5%         | conservative                                                                    | Frankfurt  |
| Surgery upper abdomen             | <10%       | Sclerotherapy, lymphangiography, surgical approach, conservative, fat free diet | Dresden    |
| Lymphadenectomy paraaortic        | Ca. 30%    | Sclerotherapy, lymphangiography, surgical approach                              | Dresden    |
| Lymphadenectomy iliac             |            |                                                                                 | Dresden    |
| Adrenal gland resection           | 2%         | conservative                                                                    | Frankfurt  |
| Thyroid resection                 | 50%        |                                                                                 | Stuttgart  |
| Gastrectomy                       | 20%        |                                                                                 | Stuttgart  |
| Exploration                       |            |                                                                                 | Heidelberg |
| Sarcoma resection retroperitoneal |            |                                                                                 | Heidelberg |
| Lymph node exstirpation           |            |                                                                                 | Heidelberg |
| Pelvic exenteration               |            |                                                                                 | Dresden    |
| Gynecological surgery             |            |                                                                                 | Heidelberg |

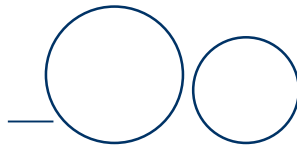

## **B – Radiological Partner Perspective**

**1. What are the 5 most common surgical procedures that result in lymphatic leakage (based on your own experience)?**

**2. In which other settings were lymphatic leakage observed?**

| Type                                       | Frequency | Standard of care                                                                    | Center                          |
|--------------------------------------------|-----------|-------------------------------------------------------------------------------------|---------------------------------|
| Lymphadenectomy inguinal iliac             | 15        | Conservative, lymphangiography, radiation therapy                                   | Frankfurt<br>Dresden<br>Dresden |
| Chylous ascites in malignant disease       | 2         | Drainage + conservative                                                             | Frankfurt                       |
| Chylous ascites after surgical procedure   | 3         | Drainage + conservative                                                             | Frankfurt                       |
| Chylous ascites in infectious disease      | 2         | Antibiotics, drainage, conservative                                                 | Frankfurt                       |
| Chylous ascites                            | 5         | Conservative, lymphangiography + embolization, surgical approach, radiation therapy | Frankfurt                       |
| Chylopericardium                           | 1         | Conservative, surgical approach                                                     | Frankfurt                       |
| Esoophagectomy                             |           |                                                                                     | Dresden                         |
| Esoophagectomy with gastric reconstruction | 300%      | Conservative, lymphangiography + embolization, surgical approach, radiation therapy | Frankfurt                       |
| Thoracic surgery diverse                   | 6         | Conservative, lymphangiography + embolization, surgical approach                    | Frankfurt                       |
| Thoracic intervention diverse              |           |                                                                                     | Dresden                         |
| (lung resection, lymphadenectomy)          |           |                                                                                     | Frankfurt                       |
| Debulking in ovarian carcinoma             | 2         | Conservative, lymphangiography + embolization                                       | Frankfurt                       |
| Postoperative lymphocele                   |           |                                                                                     | Dresden                         |



### **A and B Combined Surgical / Radiological Partner Perspective**

#### **3. *What are the main reasons why a patient is not treated by lymphography or lymphatic interventions (check one)?***

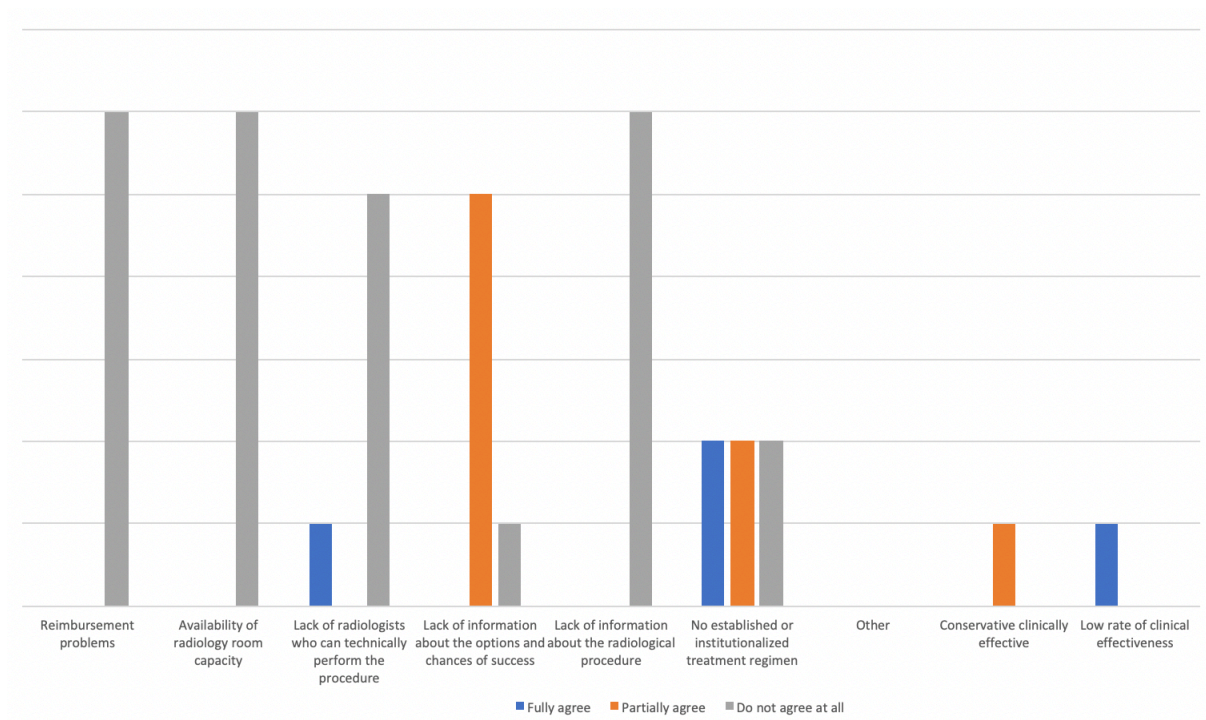

Supplement: s1 [file s1]
